# Supplementary material for: OMSV enables accurate and comprehensive identification of large structural variations from nanochannel-based single-molecule optical maps
Source: PubMed Central journal article supplement (PMC5709945; doi:10.1186/s13059-017-1356-2), 2017-12-01

## Supplementary tables

| Publication               | SV types supported | Zygoty call? | Assembly-based?                       | Software availability                  |
|---------------------------|--------------------|--------------|---------------------------------------|----------------------------------------|
| Teague et al. (2010) [18] | Indels             | No           | Yes                                   | Not publicly available                 |
| Ray et al. (2013) [17]    | Indels             | No           | Yes                                   | Not publicly available                 |
| Cao et al. (2014) [15]    | Indels/inversions  | No           | Yes                                   | Predecessor of BioNano Solve           |
| Gupta et al. (2015) [51]  | Indels             | No           | Yes                                   | Not publicly available                 |
| Mak et al. (2016) [28]    | Indels/inversions  | No           | Yes, also a module based on alignment | Predecessors of BioNano Solve and OMSV |

**Table S1** Existing SV calling methods based on optical mapping.

| Genome  | Optical maps generated | Genome coverage | FP     | FN     | Avg. optical map length (bp) | Avg. nicking sites per map | Density of nicking sites (per Mbp) | Optical maps aligned | Alignment rate |
|---------|------------------------|-----------------|--------|--------|------------------------------|----------------------------|------------------------------------|----------------------|----------------|
| Haploid | 1,500,000              | 100             | 1.2E-5 | 1.2E-1 | 200,780                      | 22.9                       | 114.0                              | 1,203,728            | 80.2%          |
| Diploid | 1,500,000              | 100             | 1.2E-5 | 1.2E-1 | 200,814                      | 22.9                       | 114.0                              | 1,214,539            | 81.0%          |
| Diploid | 300,000                | 20              | 1.2E-5 | 1.2E-1 | 200,622                      | 22.9                       | 114.1                              | 243,006              | 81.0%          |
| Diploid | 500,000                | 33              | 1.2E-5 | 1.2E-1 | 200,576                      | 22.9                       | 114.1                              | 404,805              | 81.0%          |
| Diploid | 700,000                | 47              | 1.2E-5 | 1.2E-1 | 200,681                      | 22.9                       | 114.1                              | 566,912              | 81.0%          |
| Diploid | 900,000                | 60              | 1.2E-5 | 1.2E-1 | 200,679                      | 22.9                       | 114.1                              | 728,672              | 81.0%          |
| Diploid | 1,100,000              | 73              | 1.2E-5 | 1.2E-1 | 200,771                      | 22.9                       | 114.0                              | 890,816              | 81.0%          |
| Diploid | 1,300,000              | 87              | 1.2E-5 | 1.2E-1 | 200,796                      | 22.9                       | 114.0                              | 1,052,735            | 81.0%          |
| Diploid | 1,700,000              | 113             | 1.2E-5 | 1.2E-1 | 200,820                      | 22.9                       | 114.0                              | 1,376,494            | 81.0%          |
| Diploid | 1,900,000              | 127             | 1.2E-5 | 1.2E-1 | 200,793                      | 22.9                       | 114.0                              | 1,538,631            | 81.0%          |
| Diploid | 2,100,000              | 140             | 1.2E-5 | 1.2E-1 | 200,812                      | 22.9                       | 114.0                              | 1,700,717            | 81.0%          |
| Diploid | 2,300,000              | 153             | 1.2E-5 | 1.2E-1 | 200,820                      | 22.9                       | 114.0                              | 1,862,534            | 81.0%          |
| Diploid | 2,500,000              | 167             | 1.2E-5 | 1.2E-1 | 200,786                      | 22.9                       | 114.0                              | 2,024,415            | 81.0%          |
| Diploid | 1,500,000              | 100             | 0      | 1.2E-1 | 200,713                      | 20.9                       | 104.1                              | 1,282,369            | 85.5%          |
| Diploid | 1,500,000              | 100             | 1.2E-8 | 1.2E-1 | 200,791                      | 20.9                       | 104.1                              | 1,282,268            | 85.5%          |
| Diploid | 1,500,000              | 100             | 1.2E-7 | 1.2E-1 | 200,806                      | 20.9                       | 104.1                              | 1,281,988            | 85.5%          |
| Diploid | 1,500,000              | 100             | 1.2E-6 | 1.2E-1 | 200,785                      | 21.1                       | 105.1                              | 1,276,595            | 85.1%          |
| Diploid | 1,500,000              | 100             | 3.0E-5 | 1.2E-1 | 200,772                      | 25.9                       | 129.0                              | 1,096,354            | 73.1%          |
| Diploid | 1,500,000              | 100             | 6.0E-5 | 1.2E-1 | 200,801                      | 30.7                       | 152.9                              | 1,018,500            | 67.9%          |
| Diploid | 1,500,000              | 100             | 9.0E-5 | 1.2E-1 | 200,834                      | 35.3                       | 175.8                              | 1,303,880            | 86.9%          |
| Diploid | 1,500,000              | 100             | 1.2E-4 | 1.2E-1 | 200,816                      | 39.6                       | 197.2                              | 1,366,980            | 91.1%          |
| Diploid | 1,500,000              | 100             | 1.2E-5 | 0      | 200,538                      | 25.3                       | 126.2                              | 1,309,947            | 87.3%          |
| Diploid | 1,500,000              | 100             | 1.2E-5 | 1.2E-4 | 200,525                      | 25.3                       | 126.2                              | 1,310,001            | 87.3%          |
| Diploid | 1,500,000              | 100             | 1.2E-5 | 1.2E-3 | 200,564                      | 25.3                       | 126.2                              | 1,309,055            | 87.3%          |
| Diploid | 1,500,000              | 100             | 1.2E-5 | 1.2E-2 | 200,564                      | 25.1                       | 125.1                              | 1,303,178            | 86.9%          |
| Diploid | 1,500,000              | 100             | 1.2E-5 | 2.4E-1 | 201,321                      | 20.5                       | 101.8                              | 1,037,081            | 69.1%          |
| Diploid | 1,500,000              | 100             | 1.2E-5 | 3.6E-1 | 202,626                      | 18.0                       | 88.8                               | 768,478              | 51.2%          |
| Diploid | 1,500,000              | 100             | 1.2E-5 | 4.8E-1 | 205,510                      | 15.7                       | 76.4                               | 444,795              | 29.7%          |

**Table S2** Statistics of the simulated optical maps. FP and FN refer to the rates for a fake nicking site to be observed and a real nicking site to be unobserved, respectively. The first two rows show the statistics of the haploid and diploid data sets based on the default setting, and the other rows show the settings with different genome coverage, FP and FN values.

| Genome  | Homozygous insertions | Homozygous deletions | Heterozygous insertions | Heterozygous deletions | Complex | Total |
|---------|-----------------------|----------------------|-------------------------|------------------------|---------|-------|
| Haploid | 936                   | 911                  | 0                       | 0                      | 983     | 2830  |
| Diploid | 485                   | 467                  | 451                     | 444                    | 983     | 2830  |

**Table S3** Statistics of SVs in the simulated data sets. All 27 diploid data sets listed in Table S2 were generated based on the same diploid genome with the SV profile shown here. The number of complex SVs generated is larger than that of a typical human sample, to test OMSV's ability to identify complex SVs.

| Step                                    | Time needed (hours) |                |
|-----------------------------------------|---------------------|----------------|
|                                         | Haploid genome      | Diploid genome |
| OMBlast alignment (using 1 thread)      | 225                 | 225            |
| OMBlast alignment (using 64 threads)    | 3.47                | 3.52           |
| RefAligner alignment (using 1 thread)   | 49                  | 50             |
| RefAligner alignment (using 64 threads) | 0.77                | 0.79           |
| SV calling (using 1 thread)             | 1.24                | 1.24           |
| Total (using 1 thread)                  | 226                 | 226            |
| Total (using 64 threads)                | 4.71                | 4.76           |

**Table S4** Running time of OMSV on simulated data with 100x coverage of the human genome. The total amount of time is defined as the maximum time for the two alignment methods plus the time for SV calling.

| Samples | Optical maps generated | Avg. optical map length (bp) | Avg. nicking sites per map | Density of nicking sites (per Mbp) | Optical maps aligned | Alignment rate |
|---------|------------------------|------------------------------|----------------------------|------------------------------------|----------------------|----------------|
| NA12878 | 1,540,247              | 207,926                      | 22.5                       | 108.2                              | 1,264,390            | 82.1%          |
| NA12891 | 1,481,578              | 214,366                      | 24.4                       | 113.8                              | 1,205,487            | 81.4%          |
| NA12892 | 2,065,938              | 184,264                      | 19.8                       | 107.5                              | 1,641,813            | 79.5%          |

**Table S5** Statistics of the optical maps produced from the family trio.

| Sample                          | SV type                         | On autosomes | On sex chromosomes* | X error | Y error |
|---------------------------------|---------------------------------|--------------|---------------------|---------|---------|
| NA12878 (daughter)              | Insertion                       | 538          | 27                  | N/A     | 0       |
|                                 | Deletion                        | 523          | 25                  | N/A     | 0       |
|                                 | Multiple                        | 8            | 1                   | N/A     | 0       |
|                                 | CNV                             | 29           | 1                   | N/A     | 0       |
|                                 | Medium Inversion                | 30           | 0                   | N/A     | 0       |
|                                 | Large Inversion                 | 22           | 5                   | N/A     | 0       |
|                                 | Intra-chromosomal Translocation | 1            | 0                   | N/A     | 0       |
|                                 | Inter-chromosomal Translocation | 1            | 0                   | N/A     | 0       |
|                                 | Total                           | 1,152        | 59                  | N/A     | 0       |
|                                 | NA12891 (father)                | Insertion    | 573                 | 31      | 7       |
| Deletion                        |                                 | 500          | 22                  | 8       | 1       |
| Multiple                        |                                 | 7            | 0                   | N/A     | N/A     |
| CNV                             |                                 | 22           | 6                   | N/A     | N/A     |
| Medium Inversion                |                                 | 27           | 1                   | N/A     | N/A     |
| Large Inversion                 |                                 | 25           | 4                   | N/A     | N/A     |
| Intra-chromosomal Translocation |                                 | 0            | 0                   | N/A     | N/A     |
| Inter-chromosomal Translocation |                                 | 1            | 0                   | N/A     | N/A     |
| Total                           |                                 | 1,155        | 64                  | 15      | 3       |
| NA12892 (mother)                |                                 | Insertion    | 536                 | 20      | N/A     |
|                                 | Deletion                        | 477          | 21                  | N/A     | 0       |
|                                 | Multiple                        | 6            | 0                   | N/A     | N/A     |
|                                 | CNV                             | 45           | 3                   | N/A     | N/A     |
|                                 | Medium Inversion                | 21           | 0                   | N/A     | N/A     |
|                                 | Large Inversion                 | 31           | 6                   | N/A     | N/A     |
|                                 | Intra-chromosomal Translocation | 2            | 0                   | N/A     | N/A     |
|                                 | Inter-chromosomal Translocation | 45           | 5                   | N/A     | N/A     |
|                                 | Total                           | 1,163        | 55                  | N/A     | 3       |

**Table S6** Statistics of SVs called from the optical maps produced from each member of the trio. The "Multiple" SV type corresponds to a locus with multiple indels called at the same site (two insertions, two deletions, or one insertion and one deletion). These cases are not included in the counts of the "Insertion" and "Deletion" cases. X error includes SVs called in the non-pseudo-autosomal regions of the X chromosome as heterozygous from a male sample. Y error includes SVs called in the non-pseudo-autosomal regions of the Y chromosome either from a female sample or in heterozygous form from a male sample. Since OMSV does not determine the zygosity of complex SVs, they were not included in the calculation of X and Y errors that involved zygosity. An inter-chromosomal translocation is counted as appearing on a sex chromosome if either of the two chromosomes involved is a sex chromosome. \*Pseudo-autosomal regions are excluded.

| Sample  | Total number of SVs called | Intersection with manual checking list | Validated by manual checking |                      | Validation rate   |                      |
|---------|----------------------------|----------------------------------------|------------------------------|----------------------|-------------------|----------------------|
|         |                            |                                        | Ignoring zygosity            | Considering zygosity | Ignoring zygosity | Considering zygosity |
| NA12878 | 991                        | 726                                    | 705                          | 527                  | 0.97              | 0.73                 |
| NA12891 | 1007                       | 696                                    | 669                          | 516                  | 0.96              | 0.74                 |
| NA12892 | 926                        | 642                                    | 615                          | 471                  | 0.96              | 0.73                 |

**Table S7** Accuracy of the SVs called by OMSV based on the manual checking results in Mak et al. The SVs from the three individuals were integrated and de-duplicated, and then the SVs contained in each individual were extracted from the resulting list, before comparing with the manual checking results.

| Optical maps generated | Avg. optical map length (bp) | Avg. nicking sites per map | Density of nicking sites (per Mbp) | Optical maps aligned | Alignment rate |
|------------------------|------------------------------|----------------------------|------------------------------------|----------------------|----------------|
| 1,644,102              | 244,075                      | 22.8                       | 93.4                               | 1,129,075            | 68.7%          |

**Table S8** Statistics of the optical maps produced from the C666-1 cell line.

| Sample        | SV type                         | On autosomes | On sex chromosomes* | X error | Y error |
|---------------|---------------------------------|--------------|---------------------|---------|---------|
| C666-1 (male) | Insertion                       | 527          | 16                  | 6       | 0       |
|               | Deletion                        | 262          | 5                   | 0       | 0       |
|               | Multiple                        | 3            | 0                   | N/A     | N/A     |
|               | CNV                             | 66           | 2                   | N/A     | N/A     |
|               | Medium inversion                | 24           | 4                   | N/A     | N/A     |
|               | Large inversion                 | 10           | 3                   | N/A     | N/A     |
|               | Intra-chromosomal translocation | 2            | 0                   | N/A     | N/A     |
|               | Inter-chromosomal translocation | 4            | 0                   | N/A     | N/A     |
|               | Total                           | 898          | 30                  | 6       | 0       |

**Table S9** Statistics of SVs called from the C666-1 cell line optical maps. The “Multiple” SV type corresponds to a locus with multiple indels called at the same site (two insertions, two deletions, or one insertion and one deletion). These cases are not included in the counts of the “Insertion” and “Deletion” cases. X error and Y error respectively includes SVs called in the non-pseudo-autosomal regions of the X and Y chromosome as heterozygous. Since OMSV does not determine the zygosity of complex SVs, they were not included in the calculation of X and Y errors. An inter-chromosomal translocation is counted as appearing on a sex chromosome if either of the two chromosomes involved is a sex chromosome. \*Pseudo-autosomal regions are excluded.

| SV ID                                   | $I_{o1}$              | $I_{o2}$                | $I_{o3}$              | $I_{o4}$              | $I_{o5}$                | $I_{o6}$              | $I_{o7}$              |
|-----------------------------------------|-----------------------|-------------------------|-----------------------|-----------------------|-------------------------|-----------------------|-----------------------|
| Chr                                     | 1                     | 3                       | 8                     | 12                    | 14                      | 15                    | 16                    |
| $o_1$                                   | 10,969,439            | 154,172,724             | 21,505,975            | 40,144,059            | 104,496,071             | 74,214,211            | 86,985,730            |
| $o_2$                                   | 10,971,543            | 154,184,477             | 21,525,476            | 40,149,705            | 104,499,324             | 74,220,313            | 86,988,880            |
| $s$                                     | 2,501                 | 3,273                   | 2,050                 | 2,405                 | 7,222                   | 2,217                 | 2,012                 |
| Primer location                         |                       |                         |                       |                       |                         |                       |                       |
| Left primer                             | 10,969,341-10,969,363 | 154,179,761-154,179,783 | 21,516,348-21,516,372 | 40,145,694-40,145,715 | 104,498,683-104,498,705 | 74,215,116-74,215,138 | 86,986,707-86,986,727 |
| Right primer                            | 10,971,633-10,971,656 | 154,181,240-154,181,263 | 21,517,547-21,517,570 | 40,146,848-40,146,870 | 104,499,061-104,499,084 | 74,218,504-74,218,526 | 86,987,474-86,987,496 |
| Predicted PCR product size              |                       |                         |                       |                       |                         |                       |                       |
| With SV                                 | 4,817                 | 4,776                   | 3,273                 | 3,562                 | 7,624                   | 5,628                 | 2,780                 |
| Without SV                              | 2,316                 | 1,503                   | 1,223                 | 1,157                 | 402                     | 3,411                 | 768                   |
| Detected by sequencing-based SV caller? |                       |                         |                       |                       |                         |                       |                       |
| Manta                                   | Yes                   | Yes                     | No                    | No                    | No                      | Yes                   | No                    |
| Pindel                                  | No                    | No                      | No                    | No                    | No                      | No                    | No                    |
| $b_1$                                   | 10,971,095-           | 154,180,619-            | 21,516,373-           | 40,145,895-           | 104,498,838-            | 74,216,616-           | 86,986,874-           |
| $b_2$                                   | 10,971,077            | 154,180,621             | 21,517,291            | 40,146,766            | 104,498,911             | 74,216,611            | 86,986,968            |

**Table S10** List of homozygous insertions identified by OMSV from C666-1 that underwent experimental validations. Definitions of  $o_1$ ,  $o_2$ ,  $s$ ,  $b_1$  and  $b_2$  are given in Figure S9. PCR product sizes were predicted by considering both primer locations and insertion size  $s$  determined by OMSV.

| SV ID                                   | $I_{e1}$              | $I_{e2}$              | $I_{e3}$            | $I_{e4}$                | $I_{e5}$              | $I_{e6}$                | $I_{e7}$              |
|-----------------------------------------|-----------------------|-----------------------|---------------------|-------------------------|-----------------------|-------------------------|-----------------------|
| Chr                                     | 2                     | 4                     | 5                   | 5                       | 20                    | 1                       | 4                     |
| $o_1$                                   | 22,961,852            | 37,948,238            | 9,967,483           | 137,676,345             | 61,555,087            | 223,473,487             | 96,500,882            |
| $o_2$                                   | 22,969,321            | 37,960,828            | 9,972,346           | 137,689,062             | 61,561,856            | 223,487,948             | 96,507,004            |
| $s$                                     | 6,190                 | 4,085                 | 3,496               | 4,904                   | 5,069                 | 2,428                   | 3,620                 |
| Primer location                         |                       |                       |                     |                         |                       |                         |                       |
| Left primer                             | 22,961,879-22,961,901 | 37,949,749-37,949,772 | 9,970,229-9,970,251 | 137,678,394-137,678,415 | 61,560,697-61,560,717 | 223,474,377-223,474,399 | 96,501,977-96,502,001 |
| Right primer                            | 22,963,770-22,963,792 | 37,955,267-37,955,289 | 9,971,538-9,971,560 | 137,679,399-137,679,421 | 61,561,964-61,561,985 | 223,479,822-223,479,844 | 96,502,754-96,502,777 |
| Predicted PCR product size              |                       |                       |                     |                         |                       |                         |                       |
| With SV                                 | 8,104                 | 9,626                 | 4,828               | 7,232*                  | 6,358                 | 7,896                   | 4,421                 |
| Without SV                              | 1,914                 | 5,541                 | 1,332               | 1,028                   | 1,289                 | 5,468                   | 801                   |
| Detected by sequencing-based SV caller? |                       |                       |                     |                         |                       |                         |                       |
| Manta                                   | No                    | Yes (het.)            | Yes (het.)          | Yes (het.)              | No                    | No                      | Yes (het.)            |
| Pindel                                  | No                    | No                    | No                  | No                      | No                    | No                      | No                    |
| $b_1$                                   | 22,962,381-           | 37,950,488-           | 9,971,225-          | 137,682,429-            | 61,559,538-           | Unable to infer         | Unable to infer       |
| $b_2$                                   | 22,962,381            | 37,950,488            | 9,971,225           | 137,682,429             | 61,559,499            | Unable to infer         | Unable to infer       |

**Table S11** List of heterozygous insertions identified by OMSV from C666-1 that underwent experimental validations. Definitions of  $o_1$ ,  $o_2$ ,  $s$ ,  $b_1$  and  $b_2$  are given in Figure S9. PCR product sizes were predicted by considering both primer locations and insertion size  $s$  determined by OMSV. In the Manta predictions, het. denotes that the SV was predicted to be heterozygous. \*The predicted PCR product size of  $I_{e4}$  is not equal to the summation of the size without SV and  $s$ , because GapCloser’s result reveals an extra deletion of around 1,300bp between  $o_1$  and  $o_2$  but outside the designed primer pair. As a result, the expected PCR product size without the SV is not affected (since the deletion is outside the primer pair) and is equal to the span of the genomic region covered by the two primers, but the estimated insertion size  $s$  should be increased by 1,300bp since it was originally inferred by OMSV without knowing that the two defining nicking sites were actually 1,300bp closer to each other in C666-1 as compared to the reference genome.

| SV ID                                   | $C_1$                               | $C_2$                     | $C_3$                       |
|-----------------------------------------|-------------------------------------|---------------------------|-----------------------------|
| Type                                    | Inter-trans.                        | Intra-trans.              | Inversion                   |
| Chr 1st                                 | 5                                   | 8                         | X                           |
| $o_1$                                   | 77,697,732                          | 22,574,642                | 149,634,449                 |
| Translocated segment 1st                | left of $o_1$                       | left of $o_1$             |                             |
| Chr 2nd                                 | 8                                   | 8                         | X                           |
| $o_2$                                   | 27,323,114                          | 30,293,029                | 149,727,161                 |
| Translocated segment 2nd                | left of $o_2$                       | right of $o_2$            |                             |
| Primer location                         |                                     |                           |                             |
| Primer pair 1                           |                                     |                           |                             |
| Left primer                             | chr5:77,933,545-<br>chr5:77,933,567 | 22,570,830-<br>22,570,852 | 149,652,660-<br>149,652,682 |
| Right primer                            | chr8:27,559,009-<br>chr8:27,559,031 | 30,262,222-<br>30,262,244 | 149,748,923-<br>149,748,945 |
| Primer pair 2 (for inversions)          |                                     |                           |                             |
| Left primer                             |                                     |                           | 149,654,409-<br>149,654,431 |
| Right primer                            |                                     |                           | 149,750,609-<br>149,750,631 |
| Predicted PCR product size              |                                     |                           |                             |
| Primer pair 1                           |                                     |                           |                             |
| With SV                                 | 800-1,700                           | 400-1,300                 | 1,500-2,800                 |
| Without SV                              | No product                          | No product                | No product                  |
| Primer pair 2 (for inversions)          |                                     |                           |                             |
| With SV                                 |                                     |                           | 1,500-2,800                 |
| Without SV                              |                                     |                           | No product                  |
| Detected by sequencing-based SV caller? |                                     |                           |                             |
| Manta                                   | Yes                                 | Yes (Del.)                | No                          |
| Pindel                                  | No                                  | No                        | No                          |
| $b_{11}$                                | chr5:77,934,208-                    | 22,571,087-               | 149,653,932-                |
| $b_{12}$                                | chr5:77,934,308                     | 22,571,287                | 149,654,132                 |
| $b_{21}$                                | chr8:27,559,341-                    | 30,261,884-               | 149,748,939-                |
| $b_{22}$                                | chr8:27,559,441                     | 30,261,984                | 149,749,439                 |

**Table S12** List of complex SVs identified by OMSV from C666-1 that underwent experimental validations. Inter-trans. and Intra-trans. refer to inter-chromosomal translocation and intra-chromosomal translocation, respectively. Chr 1st and Chr 2nd are the chromosomes of the first and second break points, which are different for inter-chromosomal translocations. Definitions of  $o_1$  and  $o_2$  and locations of the break points estimated by OMSV.  $[b_{11}, b_{12}]$  and  $[b_{21}, b_{22}]$  are the approximate break point locations estimated by sequencing reads. PCR product sizes were predicted by considering both the distance between the defining nicking sites and the locations of the designed primers. In the Manta predictions, del. denotes that the SV was predicted to be a deletion.

| SV ID          | Primer | Primer sequence          |
|----------------|--------|--------------------------|
| $I_{o1}$       | Left   | GACATCCAATGCTTTCCTACTCC  |
|                | Right  | TCAAGTCAGGAAGGAAAGAGACAC |
| $I_{o2}$       | Left   | TGGATGTTGGTACTGGGAATGG   |
|                | Right  | CCAGATAAGTGGCAGCGAAGTATG |
| $I_{o3}$       | Left   | CAGGCAGTCTGGATGCATTGTAC  |
|                | Right  | GTGACTTGCCTGATCAACAGAATG |
| $I_{o4}$       | Left   | CAAGGTGAAACCCCGTCTCTAC   |
|                | Right  | GTTGTCTCTTGTGTTGAACTGC   |
| $I_{o5}$       | Left   | AAAAGGGATTCTCACACTCTCGG  |
|                | Right  | AGATCAGTATTCAGGCTCAGTGTG |
| $I_{o6}$       | Left   | TAGCCAGTCTGCAGGATGAGTAG  |
|                | Right  | CATCATGCTGCCCGTCATTCTTG  |
| $I_{o7}$       | Left   | GTAAGTGTGCTATTGGCTGTG    |
|                | Right  | GGACTGGTTAAATGGTGATTAGG  |
| $I_{e1}$       | Left   | TTACCTGAGACACATAGACTGGG  |
|                | Right  | TGGTAGCCAGACTGTAATAGG    |
| $I_{e2}$       | Left   | ATGTAGCAACTATTCAACTCTGCC |
|                | Right  | GGAATCTCTCATTAAGTCTGCG   |
| $I_{e3}$       | Left   | AACAGCCCAACAACCTCTATAGG  |
|                | Right  | TAGCAGTGTGTGAGATACCAGC   |
| $I_{e4}$       | Left   | GGCCATCATCCTGCTATTAGAG   |
|                | Right  | CAGAGATGTTGGTGCTGGTTTGC  |
| $I_{e5}$       | Left   | TTAGCTTCCAGGAACGTGAGC    |
|                | Right  | GAAGGTCCCTCTCTCTCTGG     |
| $I_{e6}$       | Left   | AGAGGGAAAGAAGGAAGGGAAGC  |
|                | Right  | TGTTAAAGCTGGAGGGAAGTAGG  |
| $I_{e7}$       | Left   | CACTCTTTCAATAAATAGTGCTGG |
|                | Right  | AGTCCAGAGCACTAGATAAGAATG |
| $C_1$          | Left   | CCAAATTCATGGGGAGGGAACAC  |
|                | Right  | CTGAGTGGAACCTGTCAATGCTG  |
| $C_2$          | Left   | GAATGAGACAGCCAGATAAGGC   |
|                | Right  | CTACCTTCAGCATCAGATCCAGG  |
| $C_3$ (pair 1) | Left   | CTTGCTATCCTCTGACCCCTGAG  |
|                | Right  | GTAACATAAGGCAGGAGATATGG  |
| $C_3$ (pair 2) | Left   | CCTACGATCACTGGCCAGCATAAC |
|                | Right  | GGTTGACAGCATGGCCAGAAACG  |

**Table S13** Primer sequences used in the PCR validation experiments of the insertions identified by OMSV from C666-1.

| Module     | Parameter                                                                     | Estimation method/default value                                      |
|------------|-------------------------------------------------------------------------------|----------------------------------------------------------------------|
| Site       | False positive rate ( $f_p$ )                                                 | 1E-5, estimated by RefAligner                                        |
| Site       | False negative rate ( $f_n$ )                                                 | 0.125, estimated by RefAligner                                       |
| Site       | P-value threshold                                                             | 1E-9                                                                 |
| Site, Size | Likelihood ratio threshold                                                    | 1E-6                                                                 |
| Site, Size | Minimum covering optical maps ( $M_{min}$ )                                   | 15 for Site, 10 for Size                                             |
| Size       | Minimum optical maps from each chromosome in heterozygous calls ( $k_{min}$ ) | $\max(5, 0.4M)$ , where $M$ is the number of covering optical maps   |
| Size       | Global distance ratio location parameter ( $r_0$ )                            | 1.0096, by MLE estimate of Matlab <code>fminsearch</code> function   |
| Size       | Global distance ratio scale parameter ( $\gamma$ )                            | 0.0291, by MLE estimate of Matlab <code>fminsearch</code> function   |
| Size       | Minimum distance change ( $\delta$ )                                          | $\max(2000, 0.05d_0)$ , where $d_0$ is the distance on the reference |

**Table S14** Parameter values used in the SV detection modules of OMSV. Abbreviations of SV types: “Site” – extra/missing sites; “Size” – SVs with large size changes; “Complex” – complex SVs.

|                  | SNP<br>(The 1000 Genomes Project Consortium, 2010) | Indel<br>(Lu et al., 2012) | Insertion/Deletion/Inversion<br>(Pang et al., 2010) |
|------------------|----------------------------------------------------|----------------------------|-----------------------------------------------------|
| Rate             | 1E-3                                               | 1E-4                       | 1E-6                                                |
| Number generated | 2,910,896                                          | 298,715                    | 2,942                                               |
| Size range (bp)  | 1                                                  | 2 – 70                     | 5,000 – 100,000                                     |

**Table S15** Parameter values used in simulating a haploid genome (i.e., step 1 of simulation). The cited publications are the references for the chosen values.

| Parameter                          | Symbol            | Value used | Rationale                                  |
|------------------------------------|-------------------|------------|--------------------------------------------|
| Number of optical maps             | $n$               | 1,500,000  | To get 100x coverage                       |
| Minimum DNA fragment size          | $l_0$             | 100,000    | Typical experimental protocol              |
| Average DNA fragment extra size    | $\mu_l$           | 100,000    | Typical size in real data                  |
| Restriction enzyme                 |                   | Nt.BspQI   | Reasonable restriction site density        |
| False negative rate                | $f_-$             | 0.12       | RefAligner's estimate from real data       |
| False positive rate                | $f_+$             | 1.2E-5     | RefAligner's estimate from real data       |
| Position parameter of sizing error | $o_\alpha$        | 1.00       | Maximum likelihood estimate from real data |
| Scale parameter of sizing error    | $s_\alpha$        | 0.02       | Maximum likelihood estimate from real data |
| Imaging resolution                 | $d_{\frac{1}{2}}$ | 700        | Observation from real data                 |
| Measurement error                  | $e$               | 50         | Pixel resolution of optical map images     |

**Table S16** Parameter values used in generating simulated optical mapping data from a haploid genome (i.e., step 2 of simulation).

## Supplementary figures

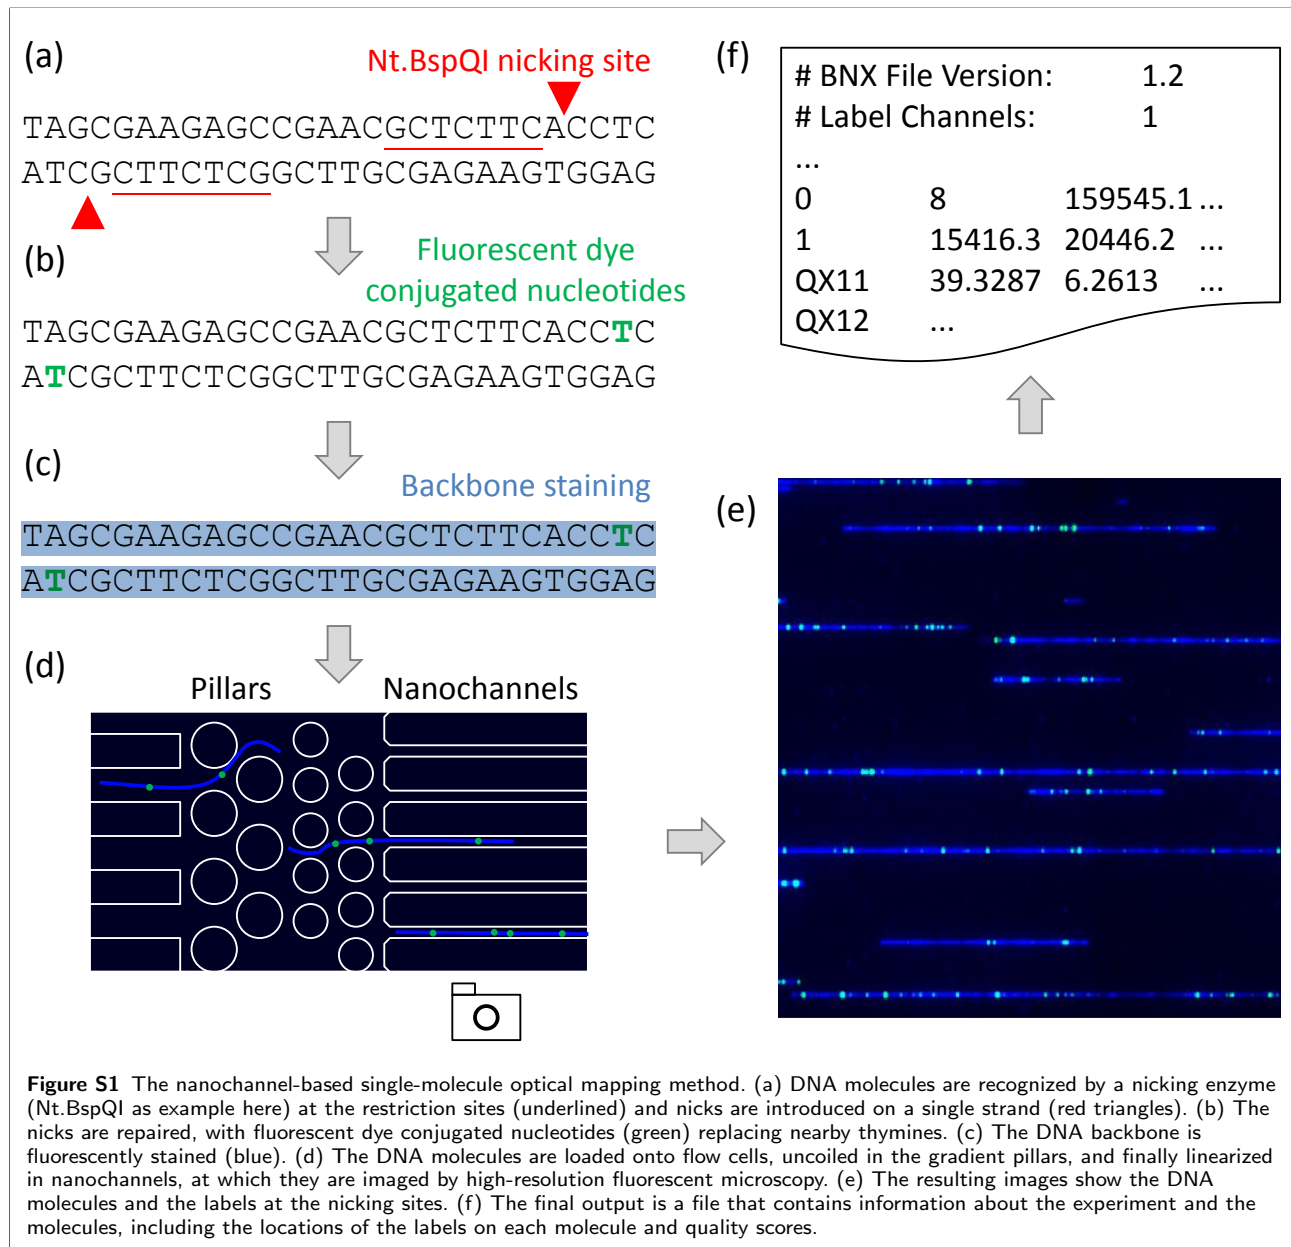

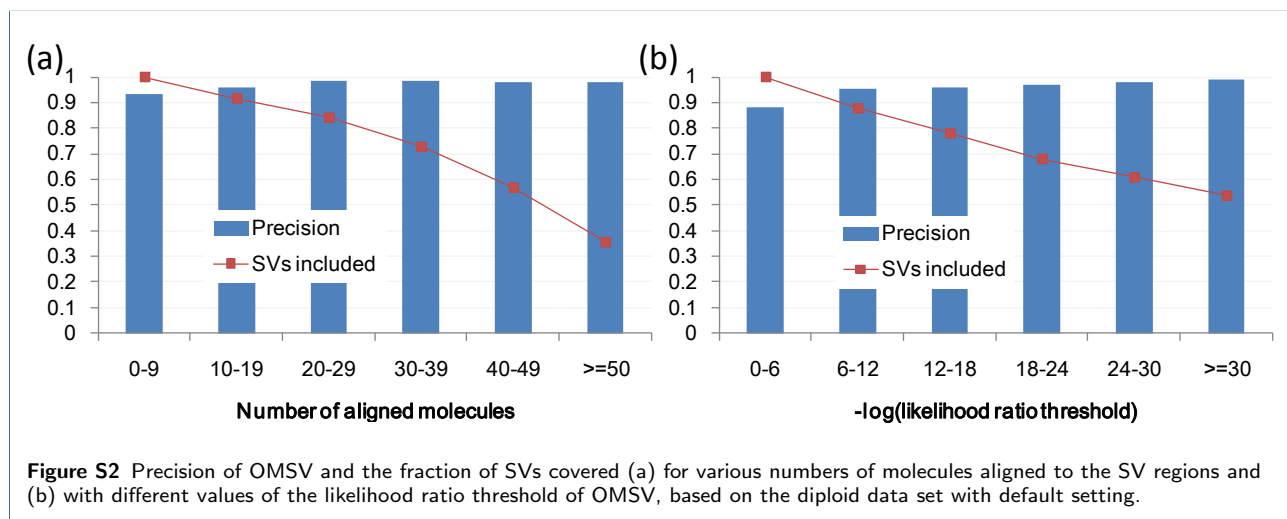

**Figure S2** Precision of OMSV and the fraction of SVs covered (a) for various numbers of molecules aligned to the SV regions and (b) with different values of the likelihood ratio threshold of OMSV, based on the diploid data set with default setting.

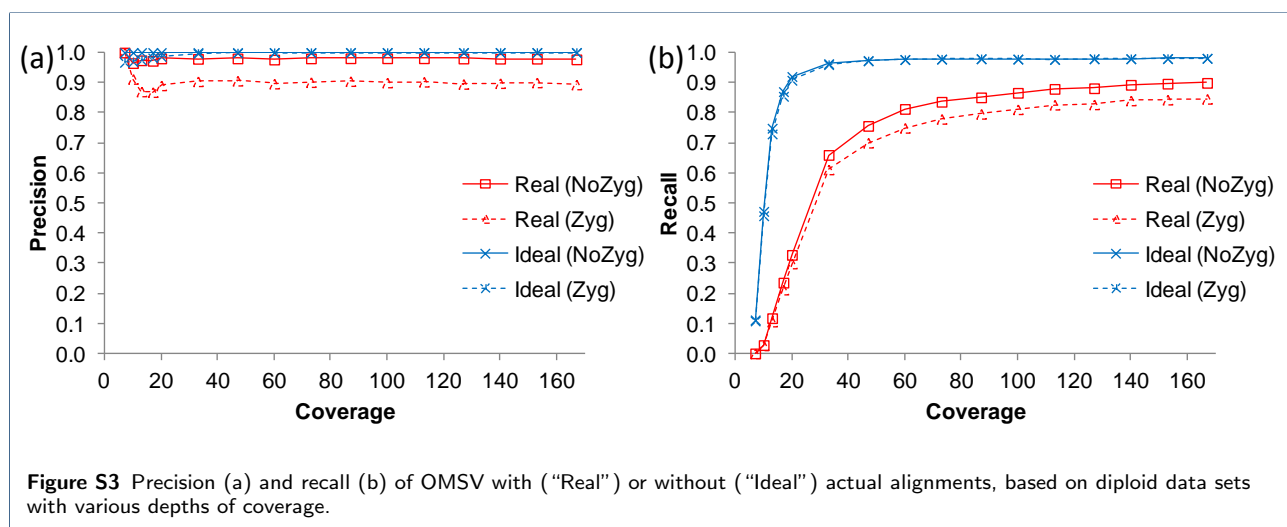

**Figure S3** Precision (a) and recall (b) of OMSV with ("Real") or without ("Ideal") actual alignments, based on diploid data sets with various depths of coverage.

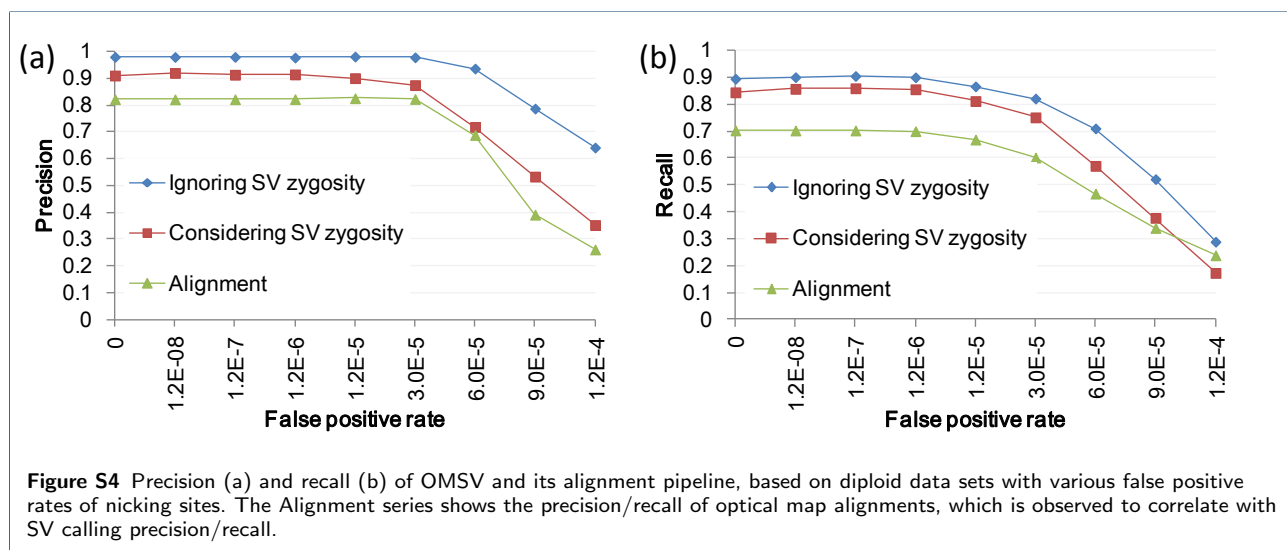

**Figure S4** Precision (a) and recall (b) of OMSV and its alignment pipeline, based on diploid data sets with various false positive rates of nicking sites. The Alignment series shows the precision/recall of optical map alignments, which is observed to correlate with SV calling precision/recall.



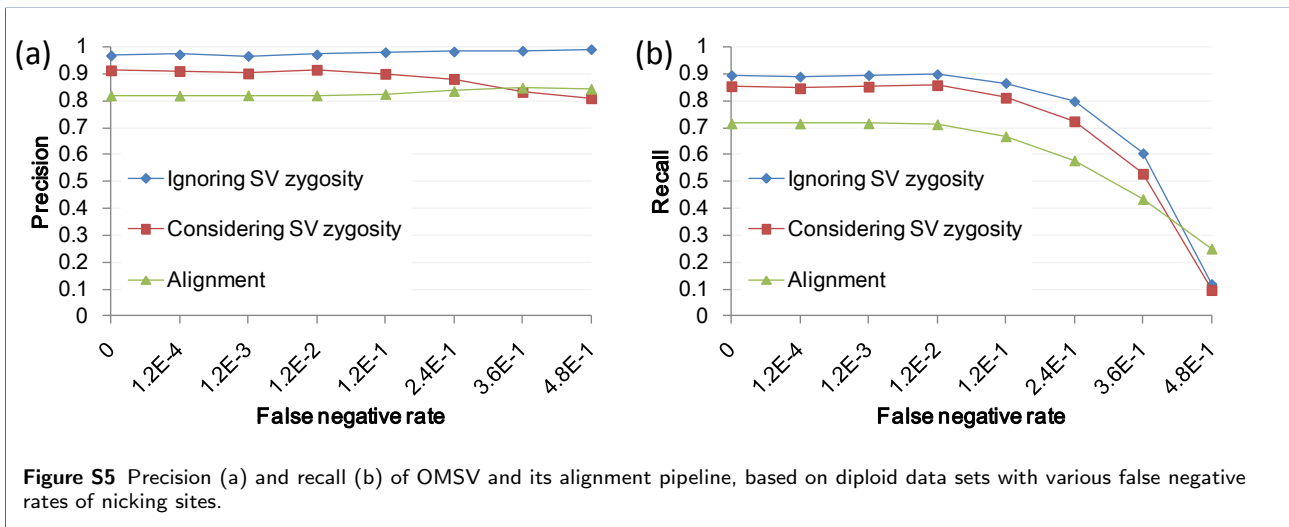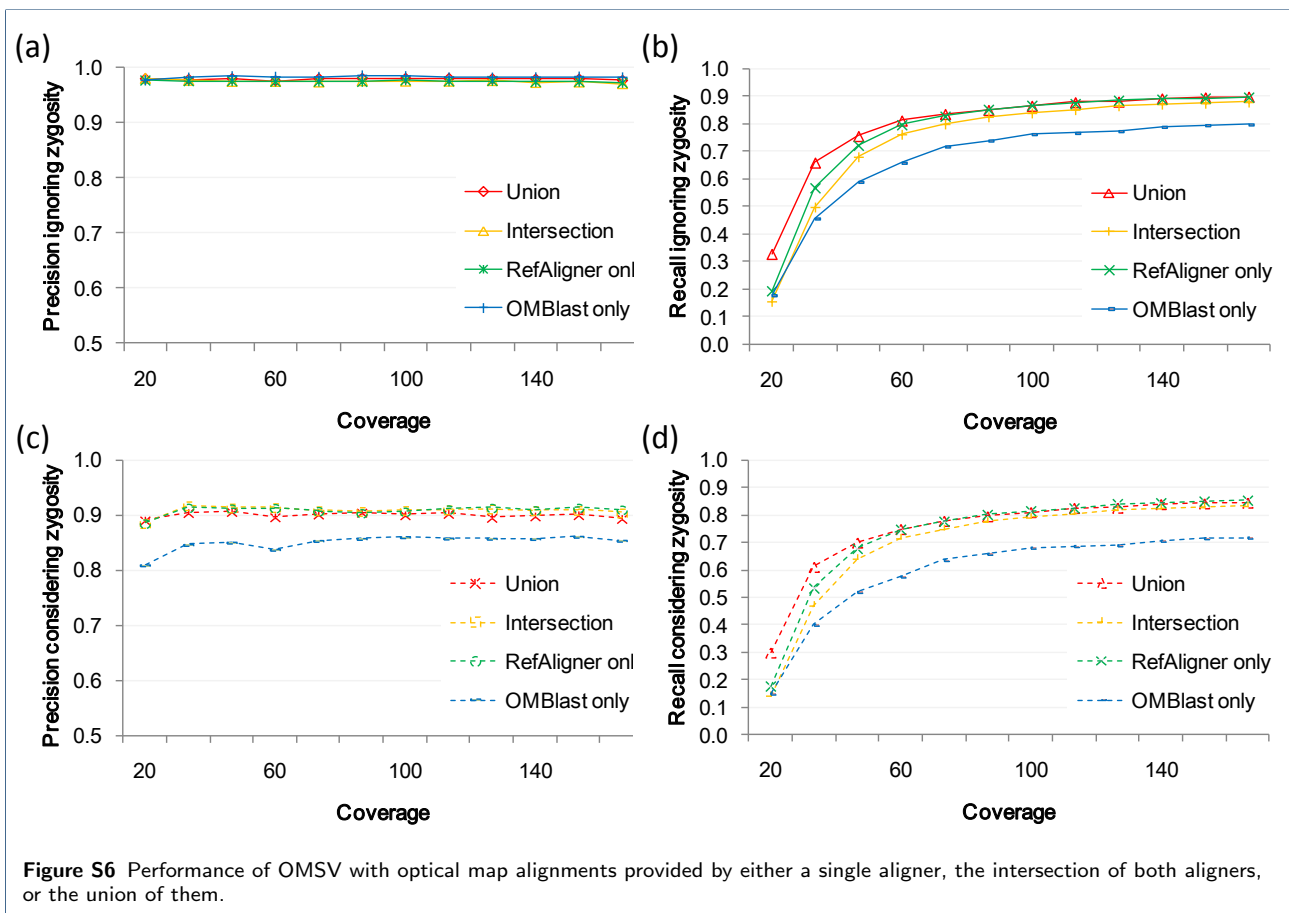

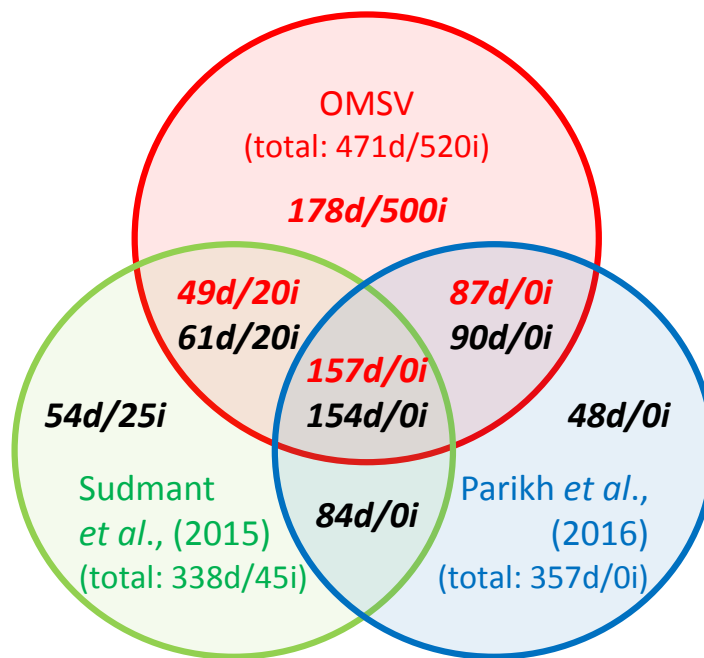

**Figure S7** Comparison of indels detected by OMSV from NA12878 with two published lists obtained by sequencing-based methods. The SVs from the three individuals of the trio were integrated and de-duplicated, and then the ones contained in NA12878 were extracted from the resulting list. In each region, the numbers of deletions and insertions are shown as del/ins, where the numbers of indels identified by OMSV are in red while the numbers of indels reported in the previous studies are in black. Since an indel on one list could overlap multiple indels on another list, the red and black numbers in the same region are not necessarily the same. Loci with both an insertion and a deletion identified were not included in this comparison since the two published lists did not contain such cases.

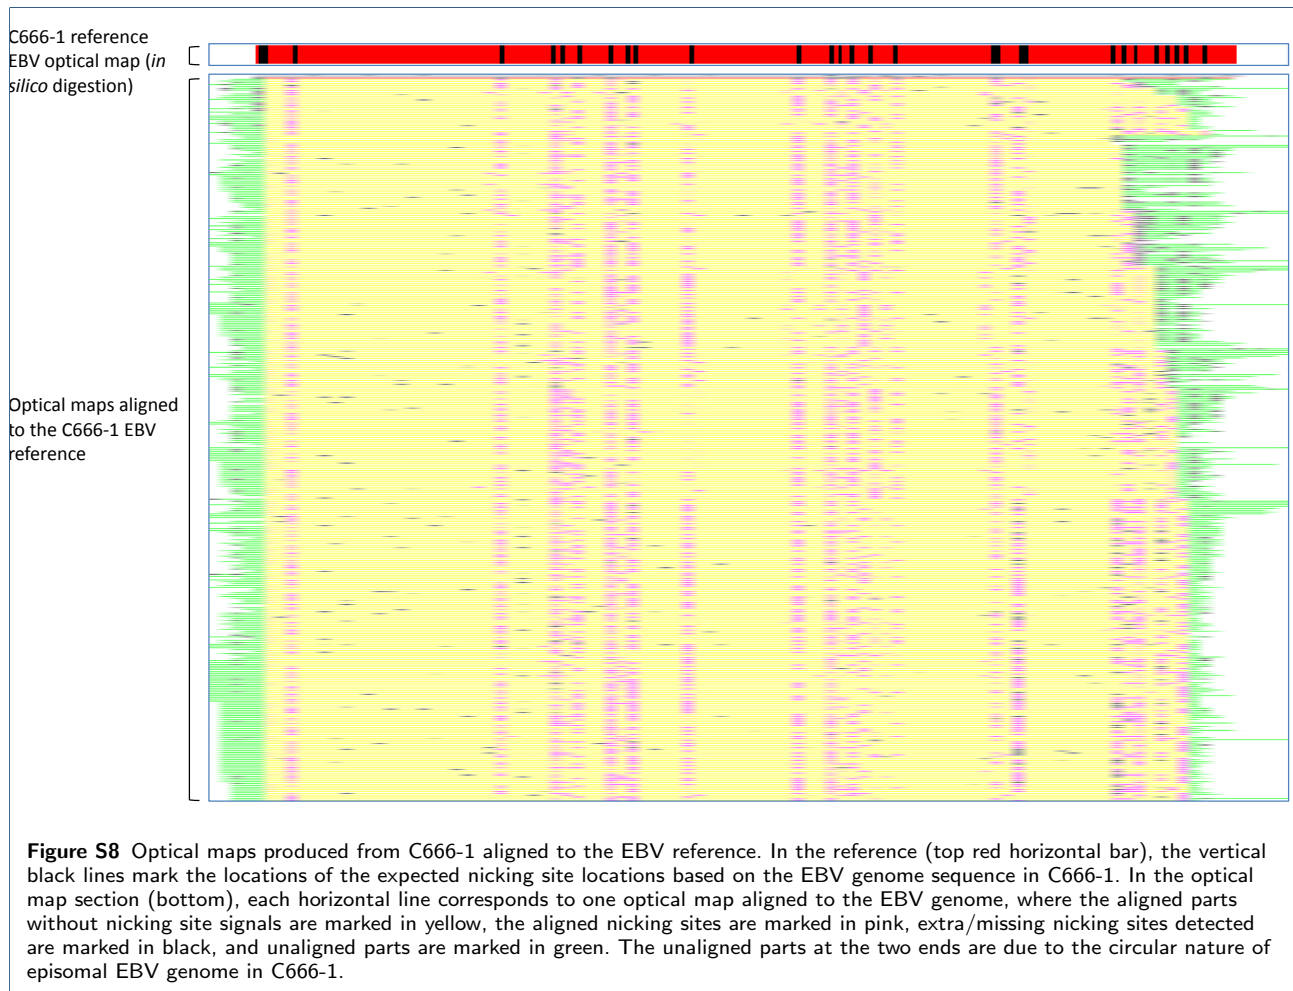

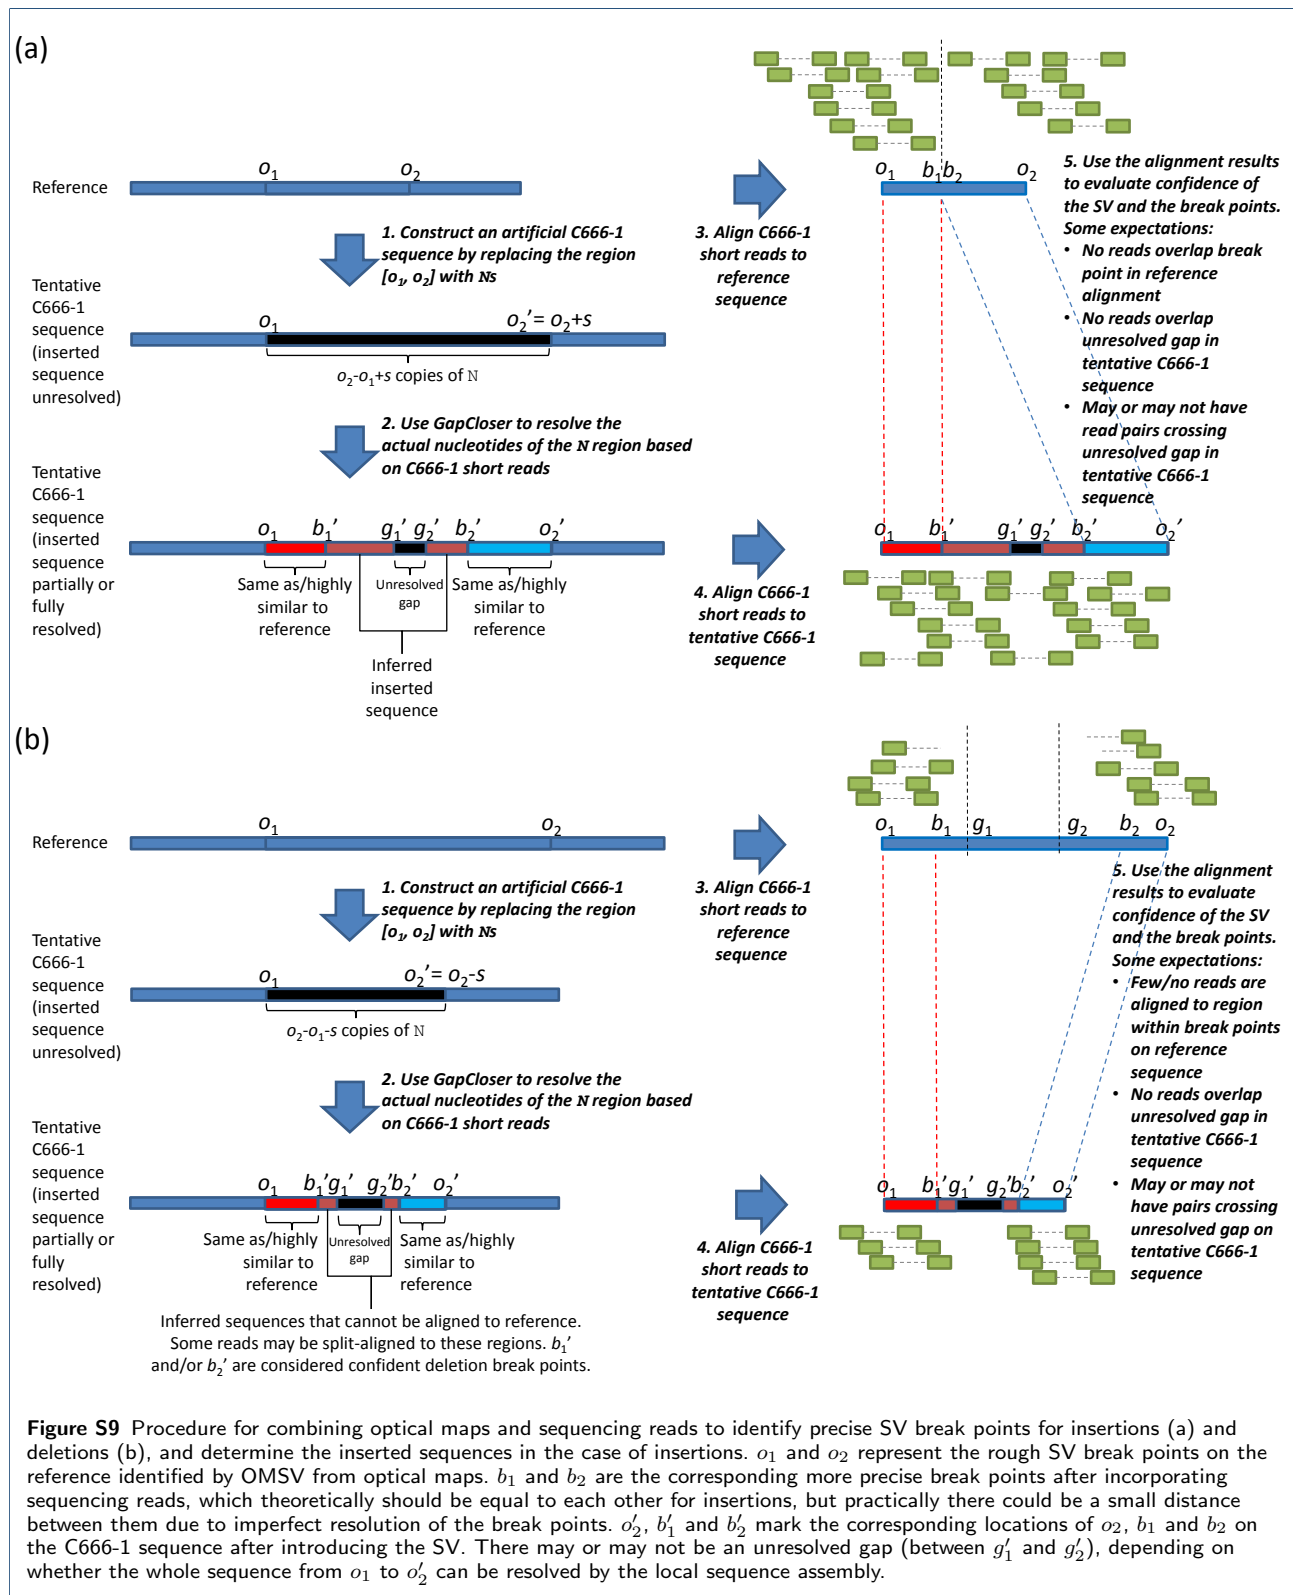

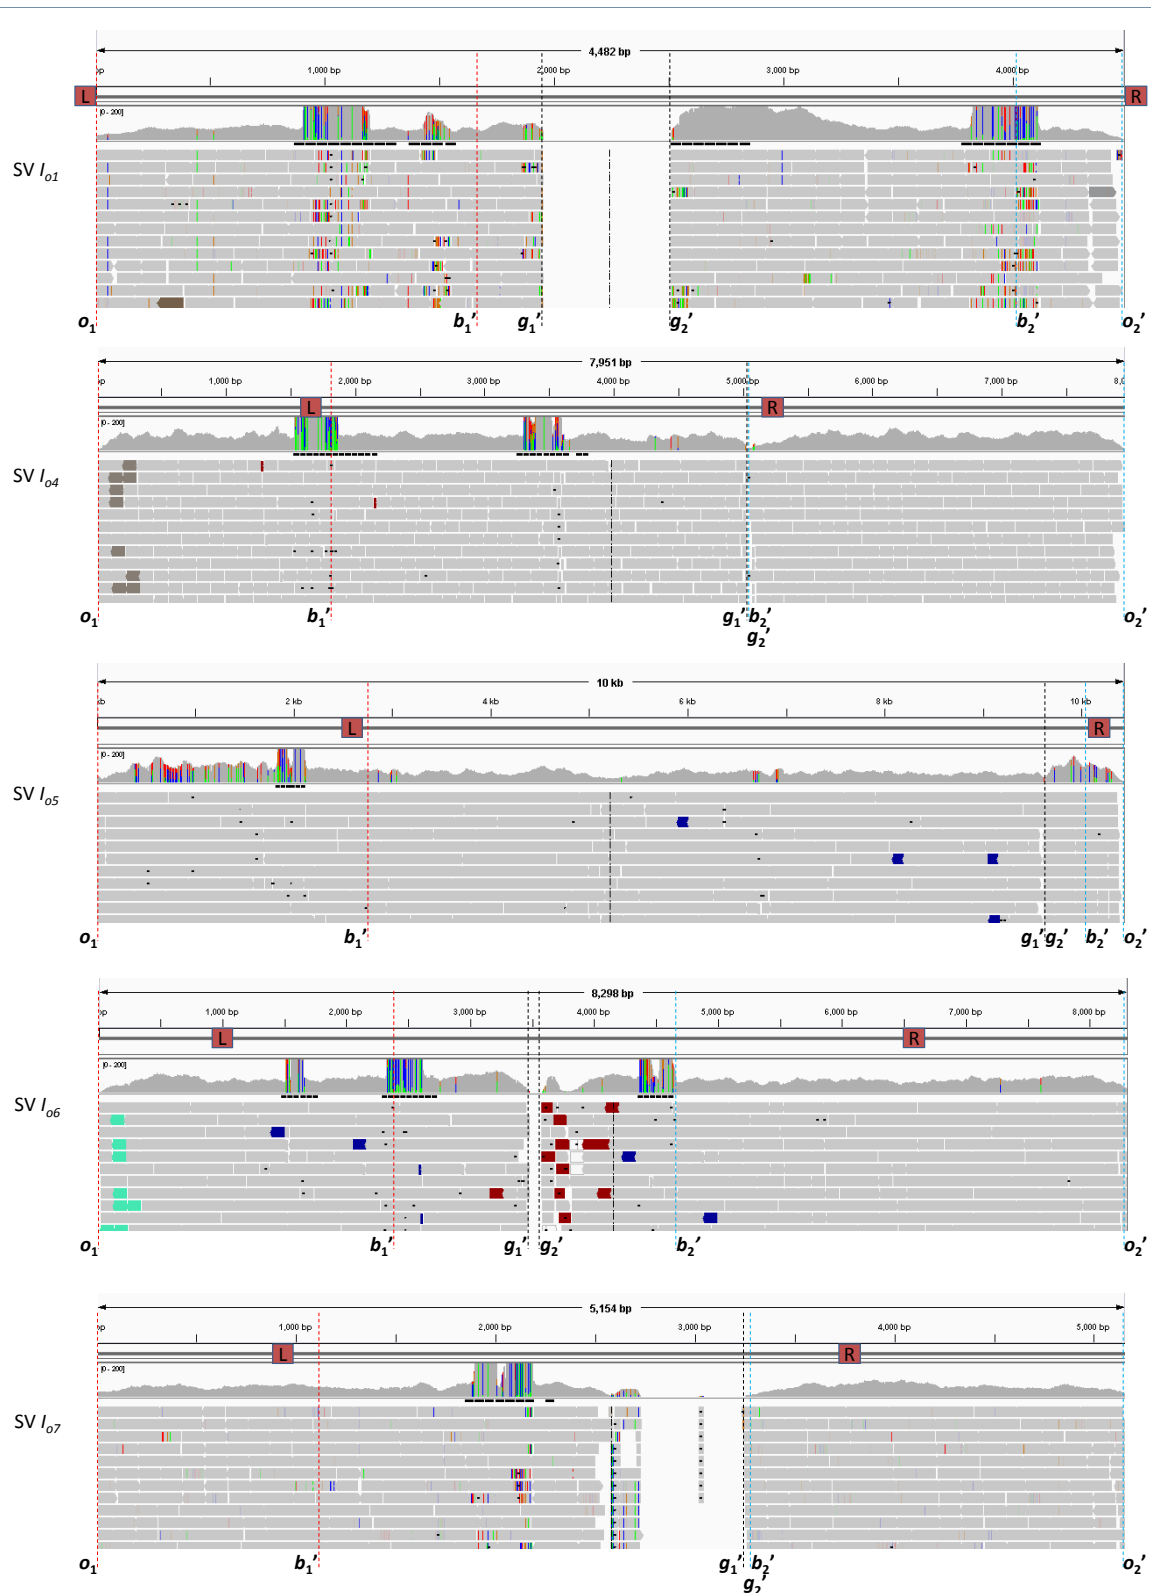

**Figure S10** Alignment of sequencing reads to the inferred C666-1 sequences of SVs  $I_{o1}, I_{o4}-I_{o7}$ . The L and R boxes mark the primer locations. Definitions of  $o_1, o_2', b_1', b_2', g_1'$  and  $g_2'$  are given in Figure S9. Sequencing read alignments are visualized by IGV. Some high-coverage regions with mismatches in the read alignments are repeat elements.

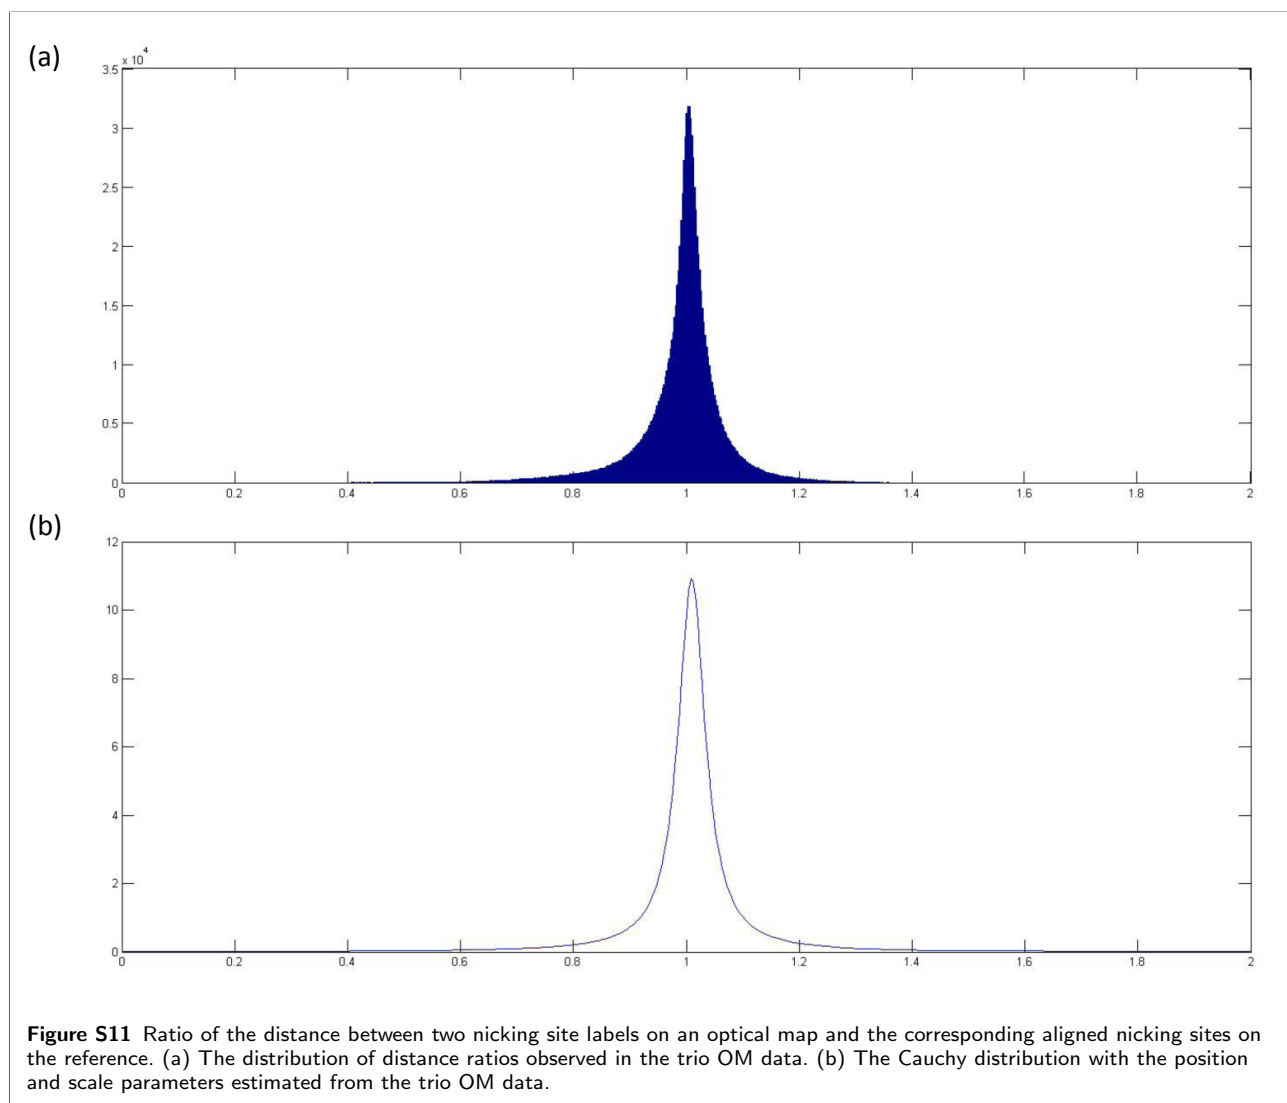

Supplement: 13059_2017_1356_MOESM1_ESM.pdf [file 13059_2017_1356_MOESM1_ESM.pdf]
