# Supplementary material for: OMSV enables accurate and comprehensive identification of large structural variations from nanochannel-based single-molecule optical maps
Source: PubMed Central journal article supplement (PMC5709945; doi:10.1186/s13059-017-1356-2), 2017-12-01

# Visualizations of selected C666-1 SVs

# Inter-Translocation

Chr5:77835508-Chr8:27558579

Molecule 1

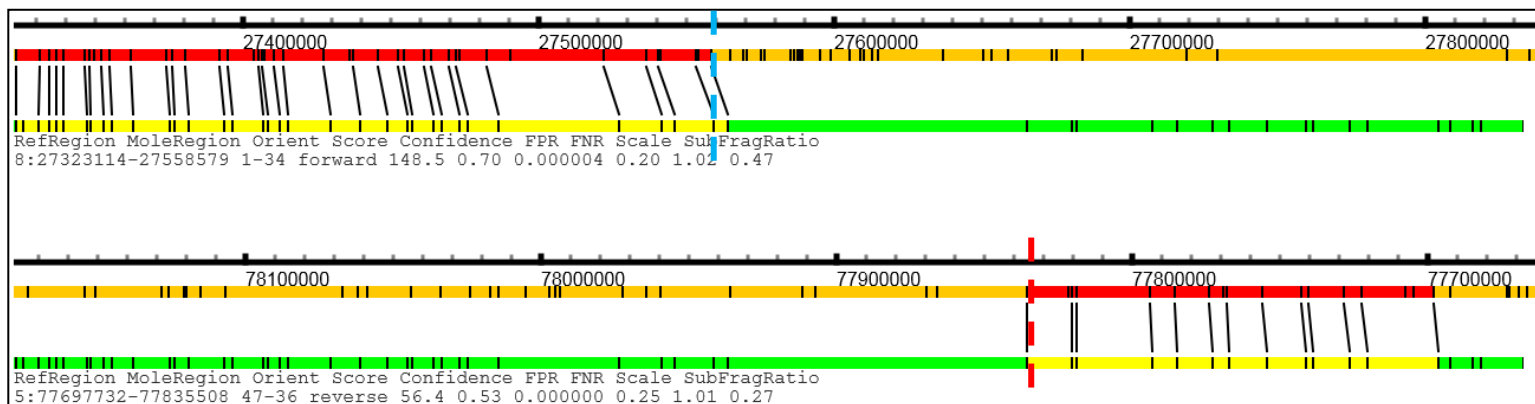

Molecule 2

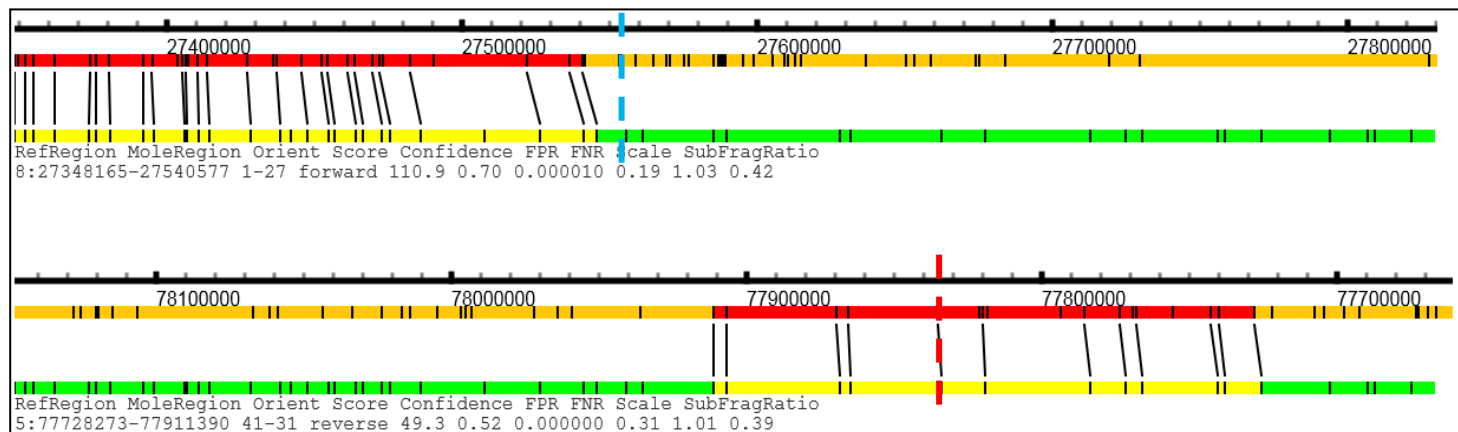

# Inter-Translocation

Chr8:102498553-chr16:49600219

(UBR5-ZNF423 translocation)

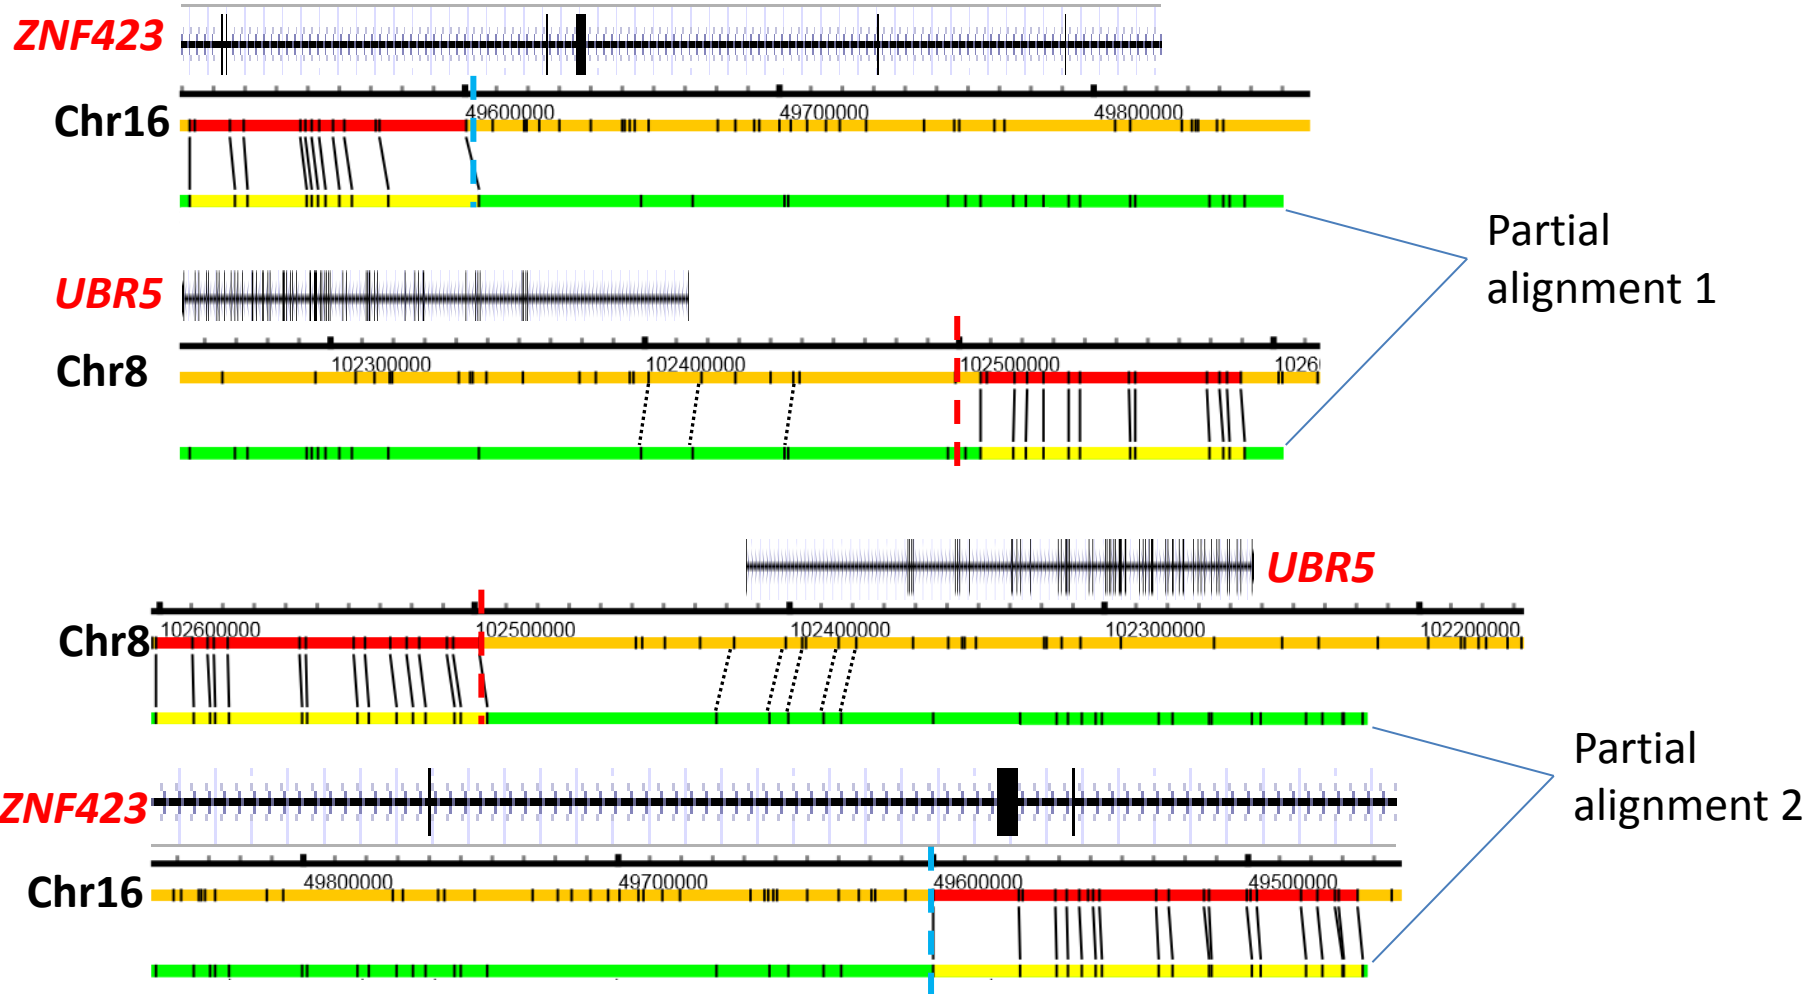

# Intra-Translocation

## Chr8:22574642-Chr8:30293029

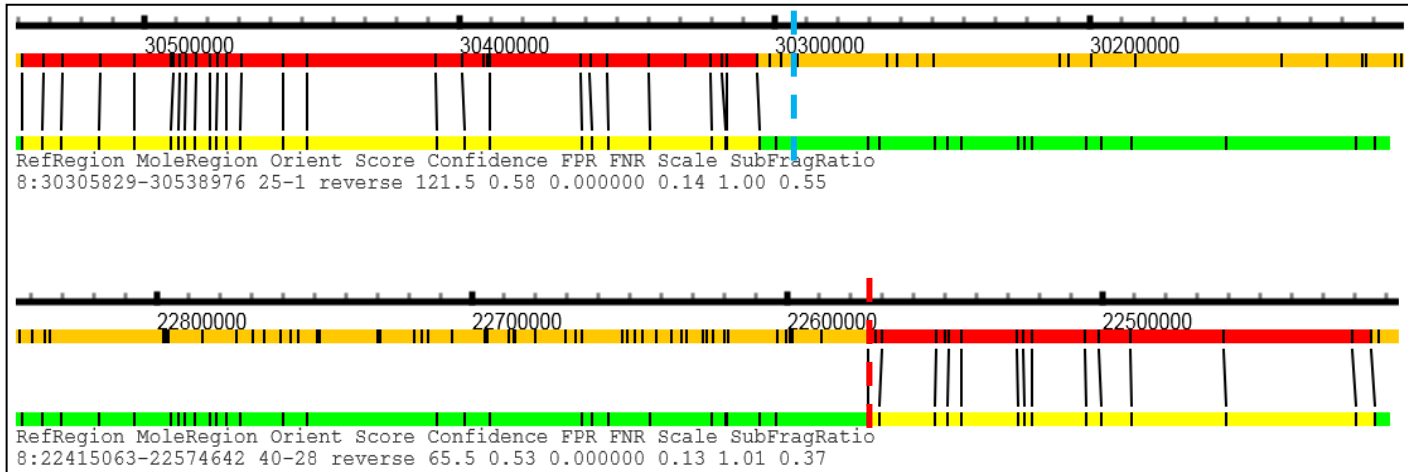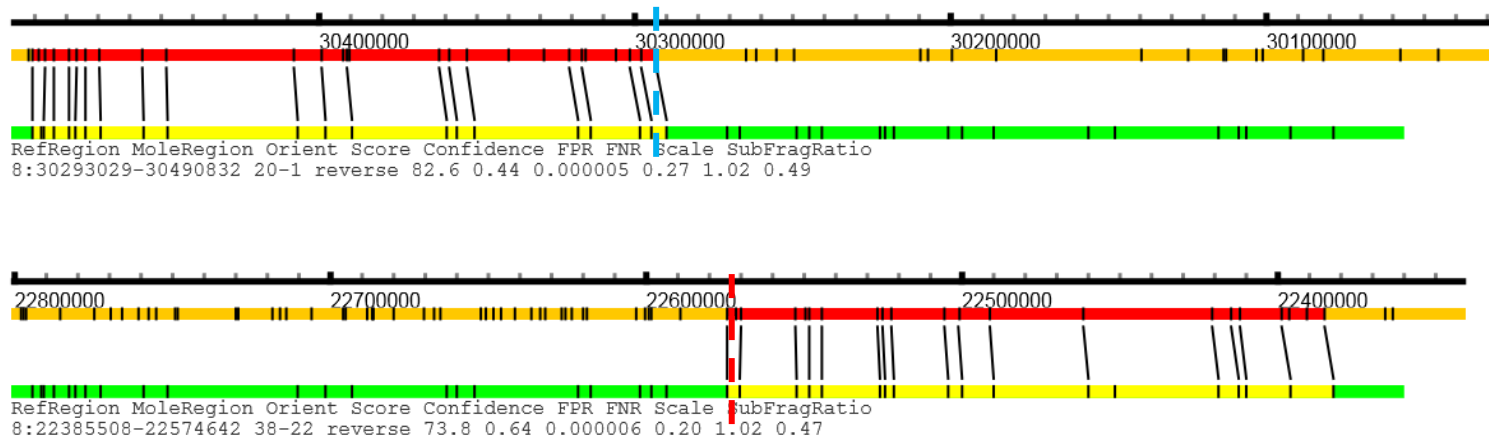

# Large Inversion

## Chr8:2256826-2433948

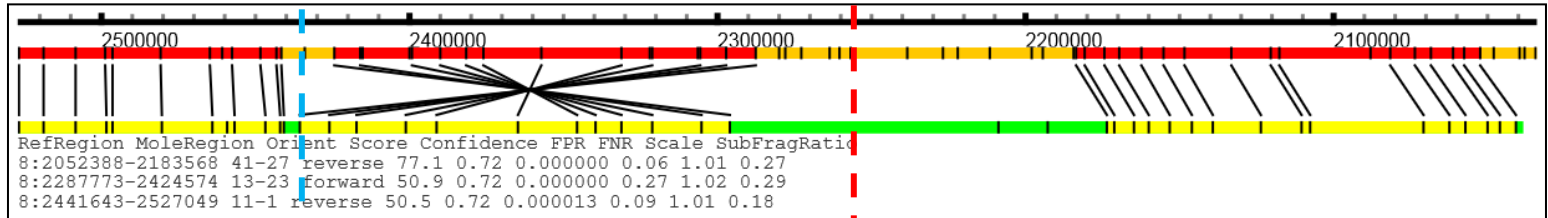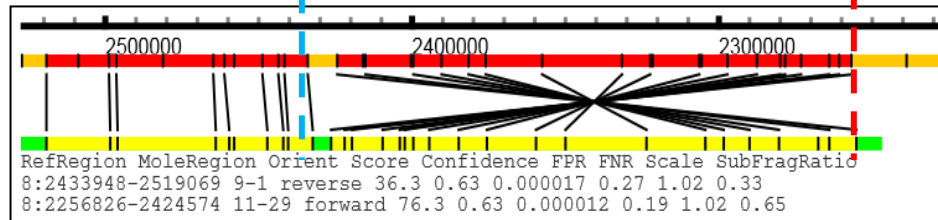

# Large Inversion

## Chr12:55174173-55516214

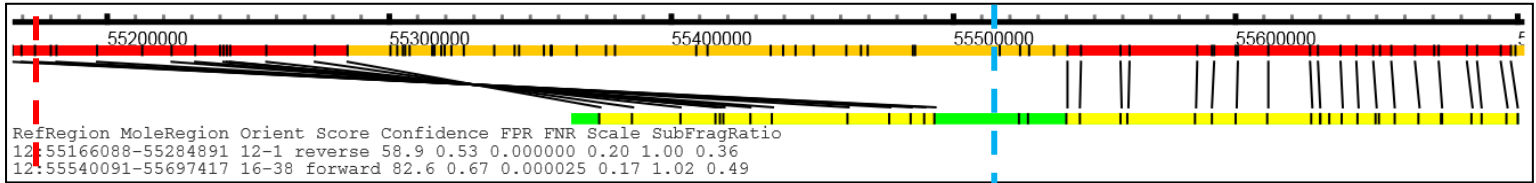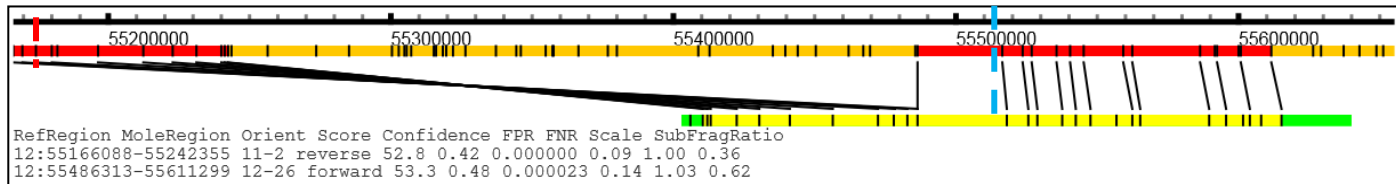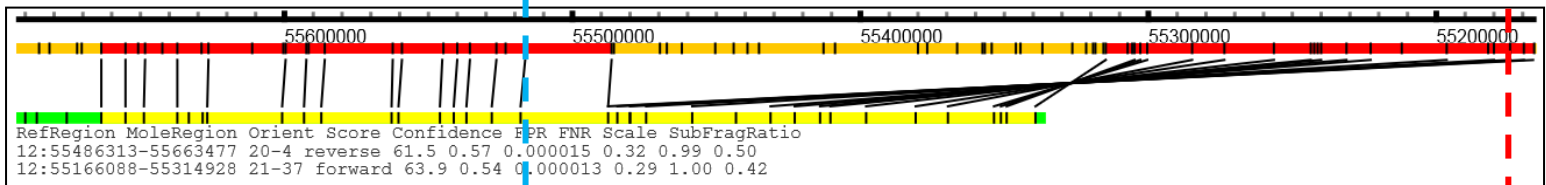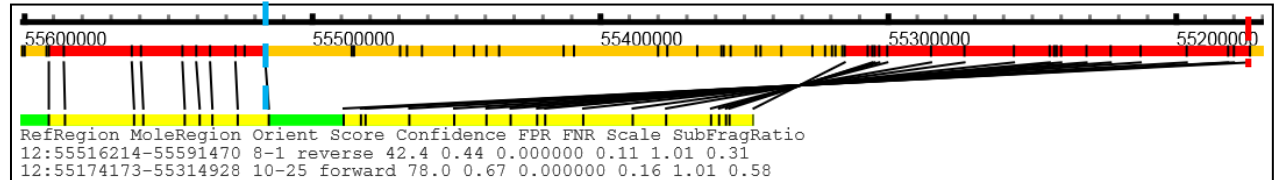

# CNV

Chr3: 52231200-52402000

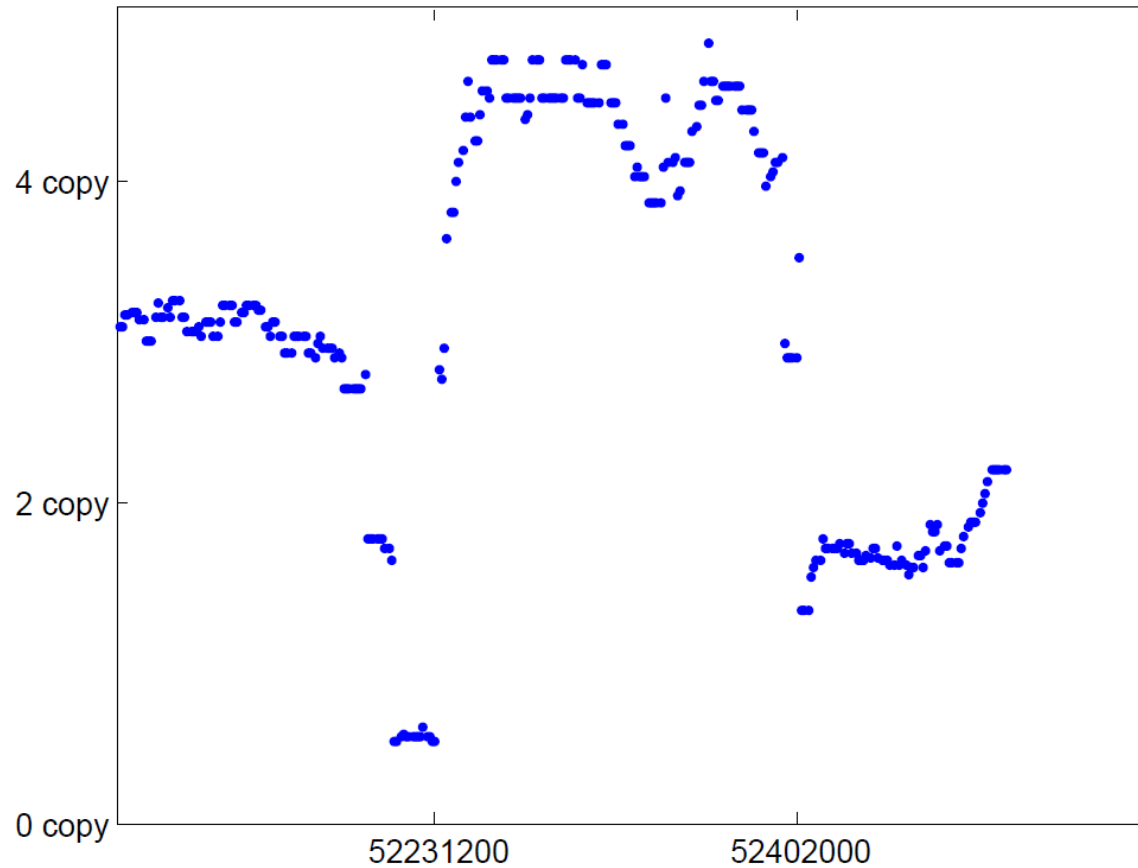

Supplement: 13059_2017_1356_MOESM5_ESM.pdf [file 13059_2017_1356_MOESM5_ESM.pdf]
